# Supplementary material for: Vaccine-associated varicella and rubella infections in severe combined immunodeficiency with isolated CD4 lymphocytopenia and mutations in IL 7 R detected by tandem whole exome sequencing and chromosomal microarray
Source: Oxford University Press journal article supplement (doi:10.1111/cei.12421), 2014-07-21
Supplement: cei12421-sup-0005-ts1.doc [file cei12421-sup-0005-ts1.doc]

**Supplemental Table S1 Mosaicism in blood and buccal DNA**

| **DNA sample tissue** | | **Sequencing Method** | **Total number of reads** | **SNV number of reads** | **WT number of reads** | **SNV**  **ratio** | **WT**  **ratio** |
| --- | --- | --- | --- | --- | --- | --- | --- |
| Blood | Pre-HSCT | WES | 19 | 14 | 5 | 0.74 | 0.26 |
| Blood | Pre-HSCT | Sanger | N/A | N/A | N/A | 0.80 | 0.20 |
| Blood | Pre-HSCT | Targeted | 760 | 591 | 169 | 0.78 | 0.22 |
| Buccal | Post-HSCT | Sanger | N/A | N/A | N/A | 0.70 | 0.30 |
| Buccal | Post-HSCT | Targeted | 213 | 150 | 63 | 0.70 | 0.30 |

Abbreviations: CNV, Copy number variant here referring to the deletion exon 3 *IL7R*; HSCT, Hematopoietic stem cell transplantation; N/A, Not applicable; SNV, Single nucleotide polymorphism here referring to c.361dupA; Targeted, SeqCap EZ solution-based capture of ~50 SCID genes including *IL7R* followed by massively parallel sequencing on Illumina HiSeq2000; Sanger, Sanger sequencing results presented in table with portions of variant versus wild-type are based on the chromatograms from Supplemental Figure 3; WES,whole exome sequencing.
