# Supplementary material for: Vaccine-associated varicella and rubella infections in severe combined immunodeficiency with isolated CD4 lymphocytopenia and mutations in IL 7 R detected by tandem whole exome sequencing and chromosomal microarray
Source: Oxford University Press journal article supplement (doi:10.1111/cei.12421), 2014-07-21
Supplement: cei12421-sup-0006-ts2.doc [file cei12421-sup-0006-ts2.doc]

**Supplemental Table S2 STRs of the patient’s pre-HSCT blood DNA**

| **Marker** | **Total peak area** | **Maternal peak area** | **Ratio** |
| --- | --- | --- | --- |
| D13S305 | 23476 | 2556 | 0.11 |
| D13S628 | 25207 | 1207 | 0.05 |
| D13S634 | 16078 | 901 | 0.06 |
| D18S386 | 25075 | 2549 | 0.10 |
| D18S819 | 16176 | 1062 | 0.07 |
| D18S978 | 68456 | 6226 | 0.09 |
| D21S11 | 21182 | 2227 | 0.11 |
| D21S1435 | 19833 | 927 | 0.05 |
| D21S1437 | 18327 | 1912 | 0.10 |
| D21S1442 | 29862 | 1829 | 0.06 |
| D21S1446 | 24837 | 1289 | 0.05 |
| DXS1187 | 28936 | 2354 | 0.08 |
| XHPRT | 43717 | 2642 | 0.06 |

STR analysis using ElucigeneTM QST*R plusv2 kit and GeneMarker V1.95 analysis software.

Performed on DNA from patient’s whole blood sample collected pre-HSCT. The non-inherited maternal STR peaks show ratios between 0.5-0.11 relative to the patient’s inherited STR peaks for each marker.

Abbreviations: HSCT, Hematopoietic stem cell transplantation; STR, Short tandem repeat
