# Supplementary figures and images for: Vaccine-associated varicella and rubella infections in severe combined immunodeficiency with isolated CD4 lymphocytopenia and mutations in IL 7 R detected by tandem whole exome sequencing and chromosomal microarray
Source: Oxford University Press journal article supplement (doi:10.1111/cei.12421), 2014-07-21

*IL7R* gene is located 5p13.2 in genomic position g.35,856,977-35,879,705

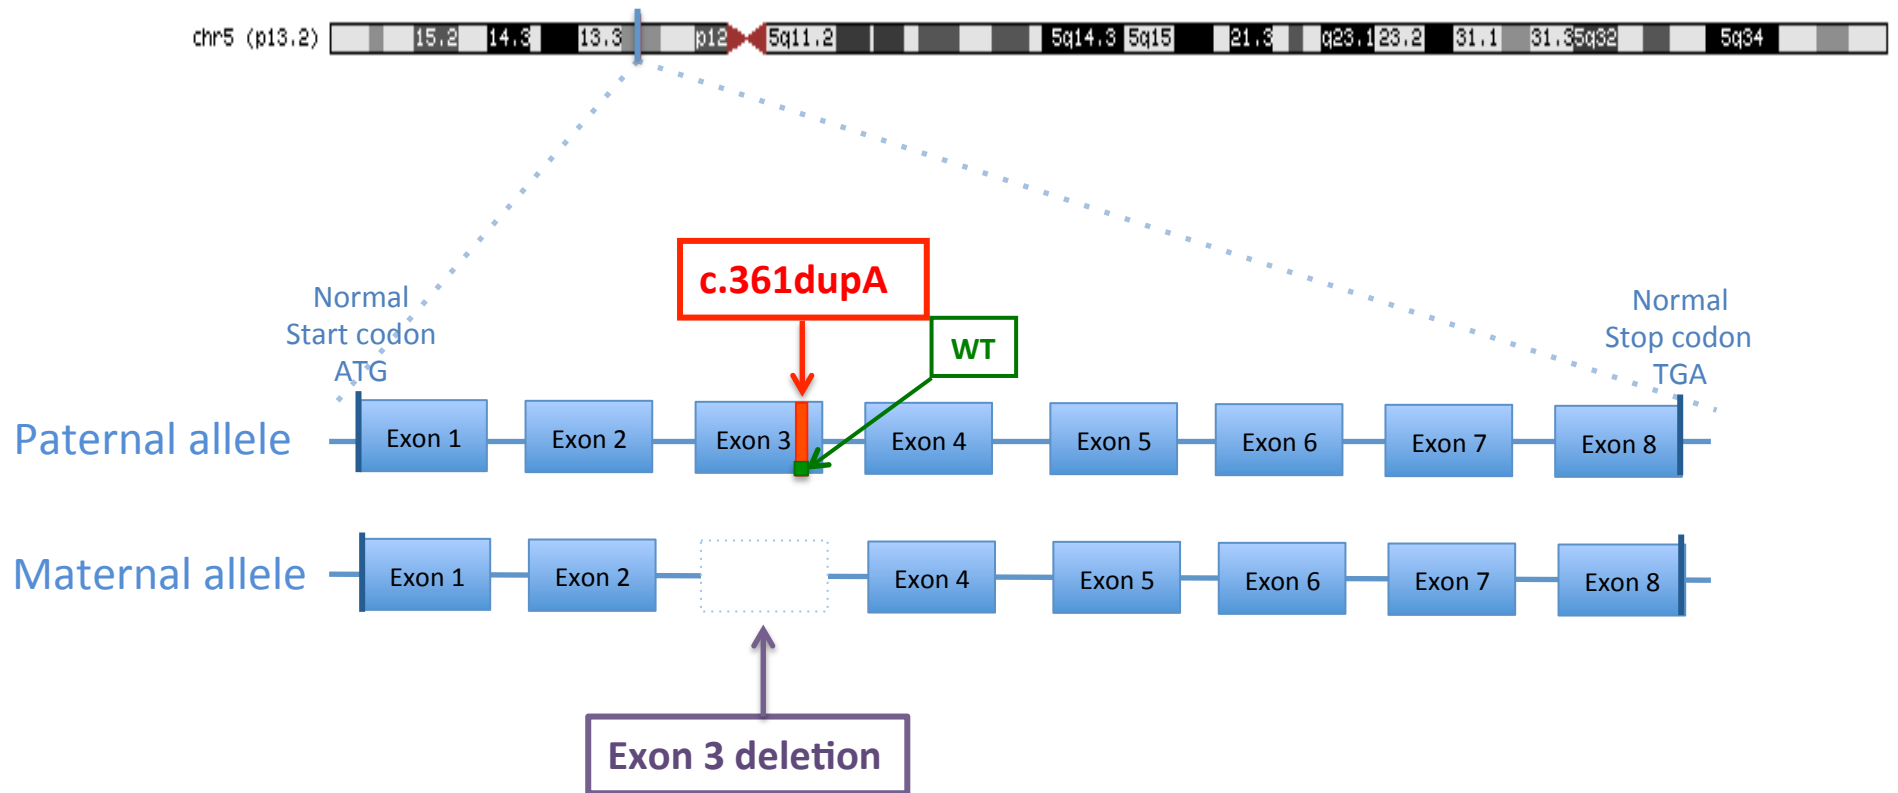

**Supplemental Figure S1**

Supplement: cei12421-sup-0001-fs1.pdf [file cei12421-sup-0001-fs1.pdf]

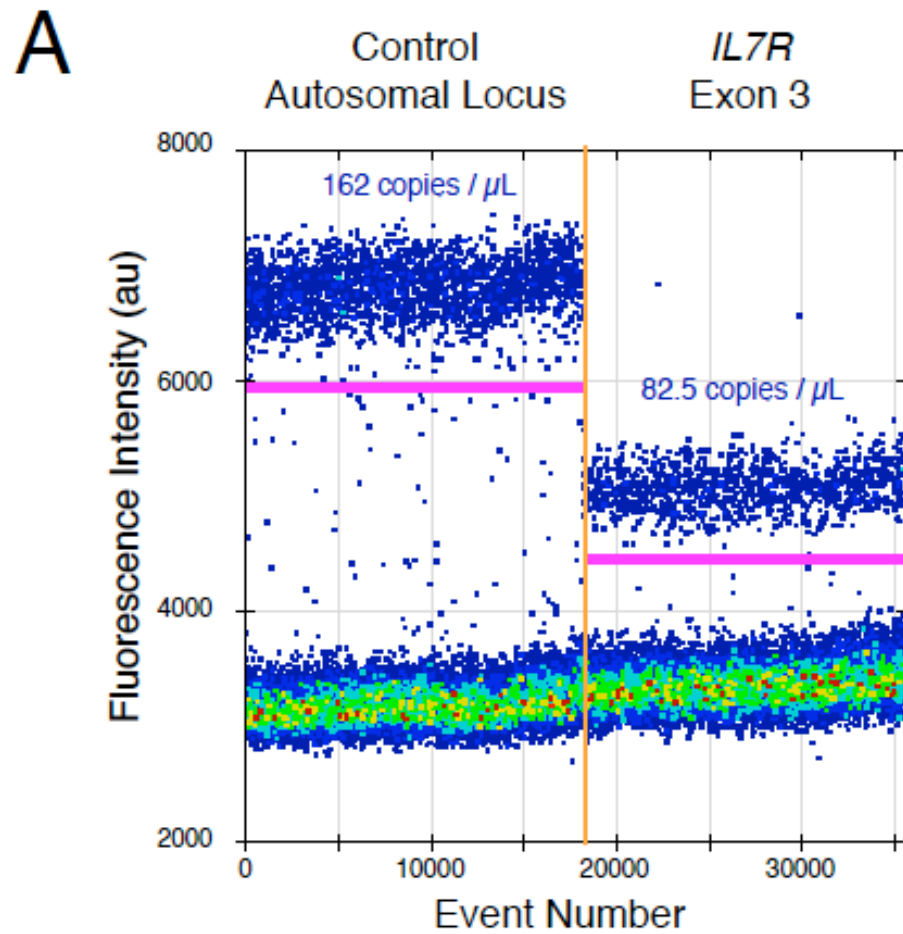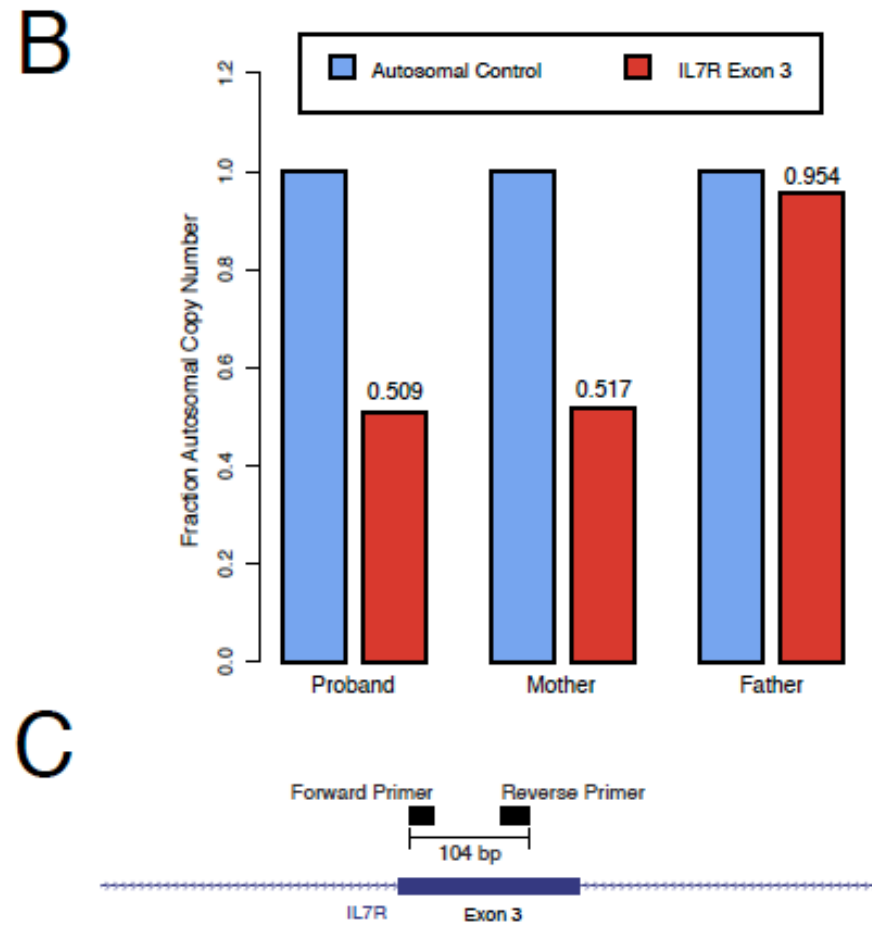

Supplemental Figure S2

Supplement: cei12421-sup-0002-fs2.pdf [file cei12421-sup-0002-fs2.pdf]

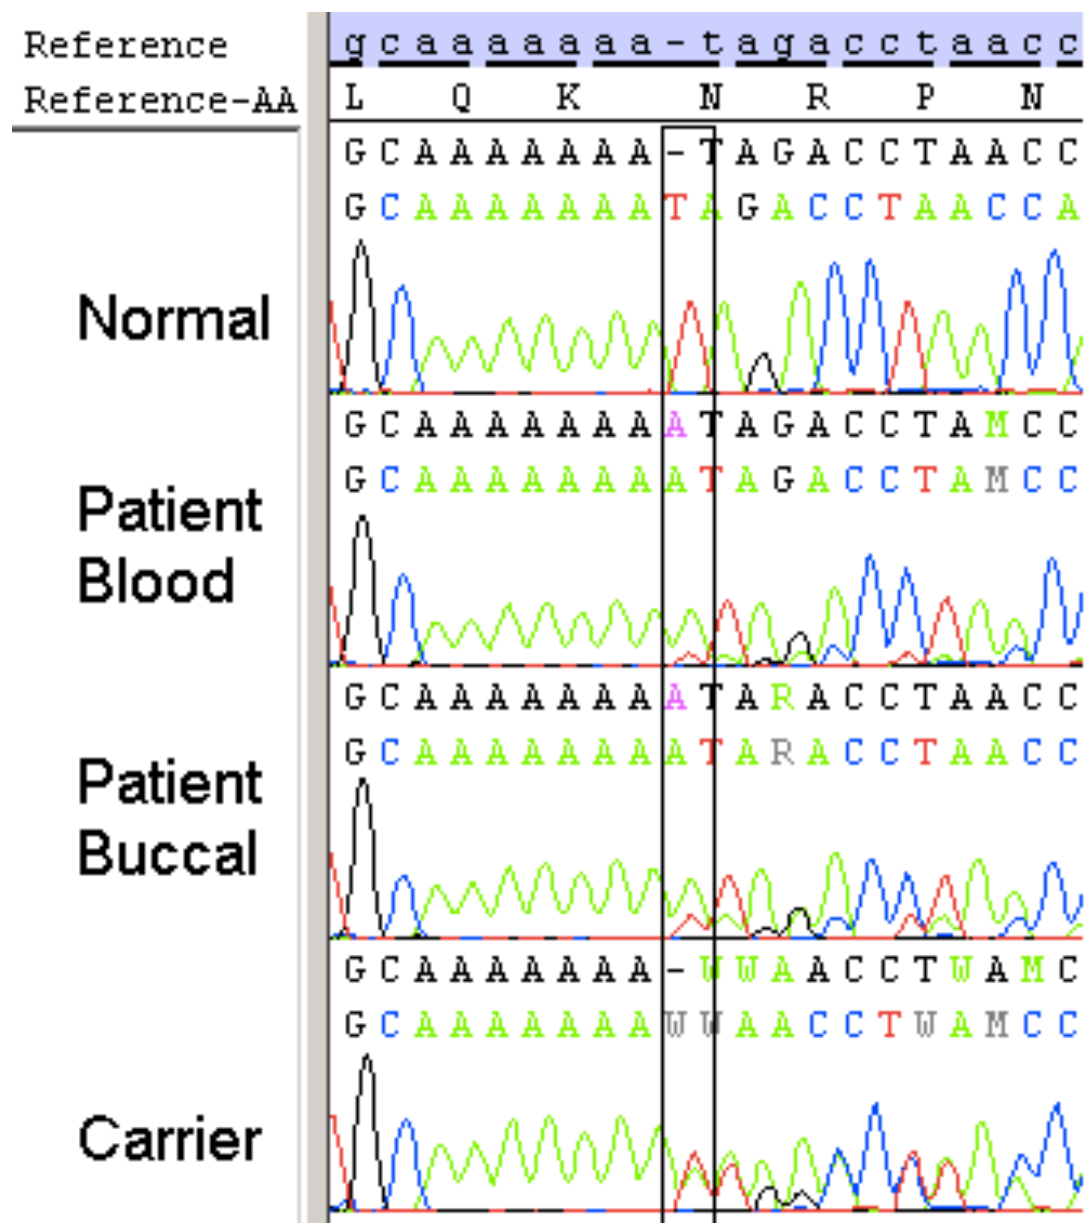

Supplemental Figure S3

Supplement: cei12421-sup-0003-fs3.pdf [file cei12421-sup-0003-fs3.pdf]

maternal engraftment

A

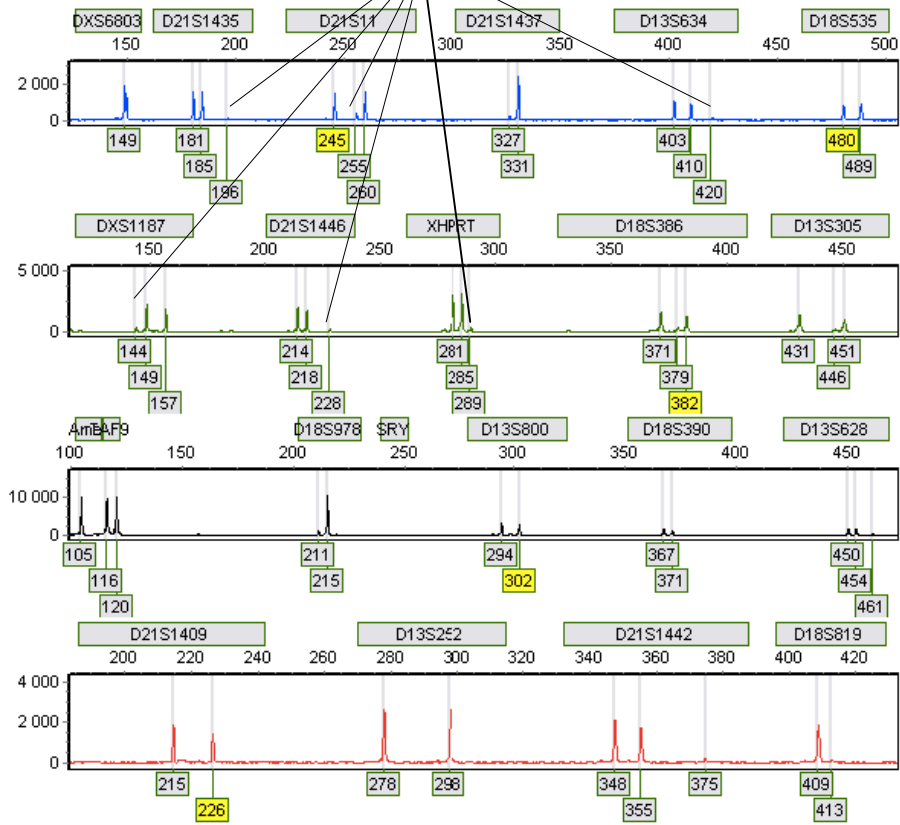

B

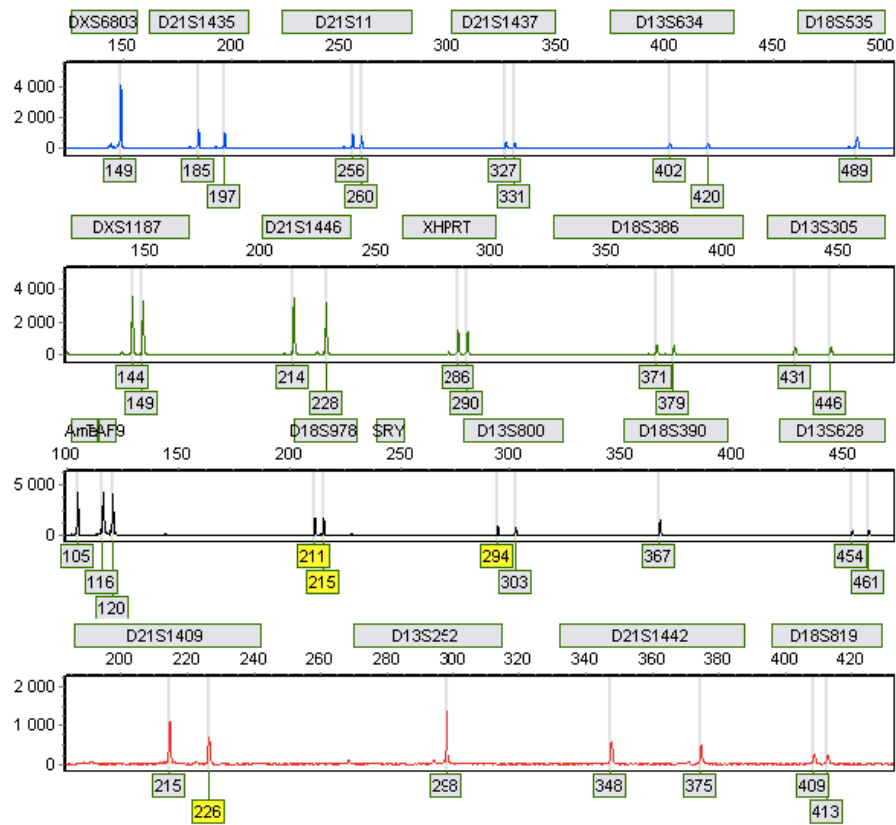

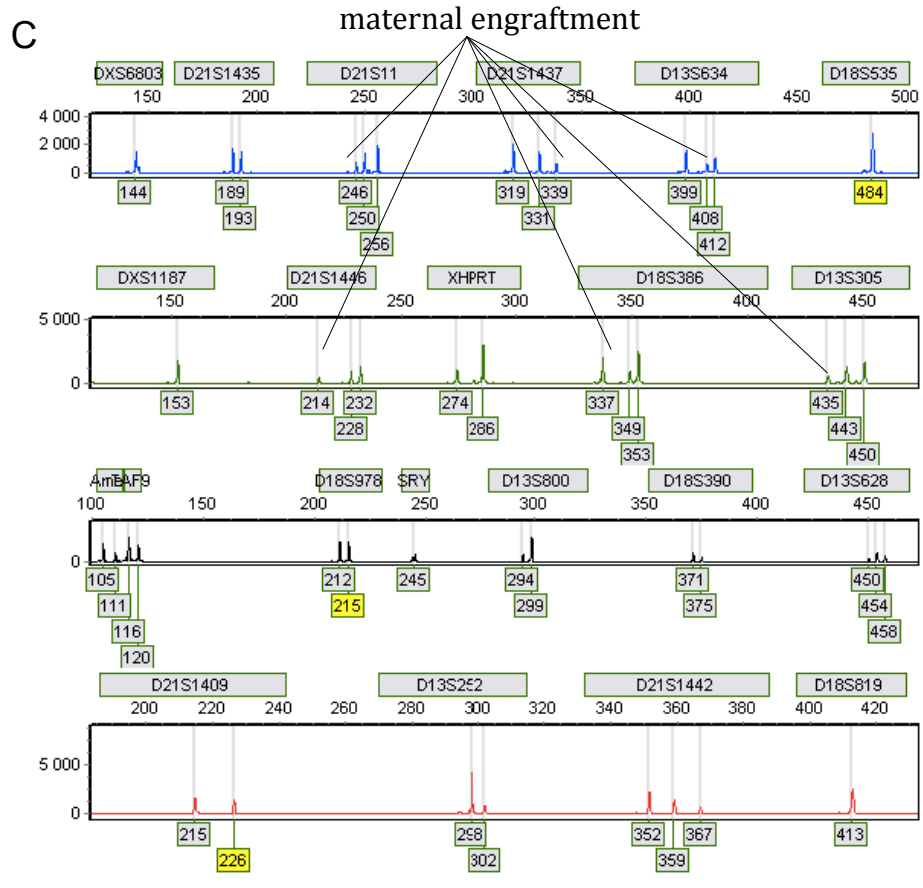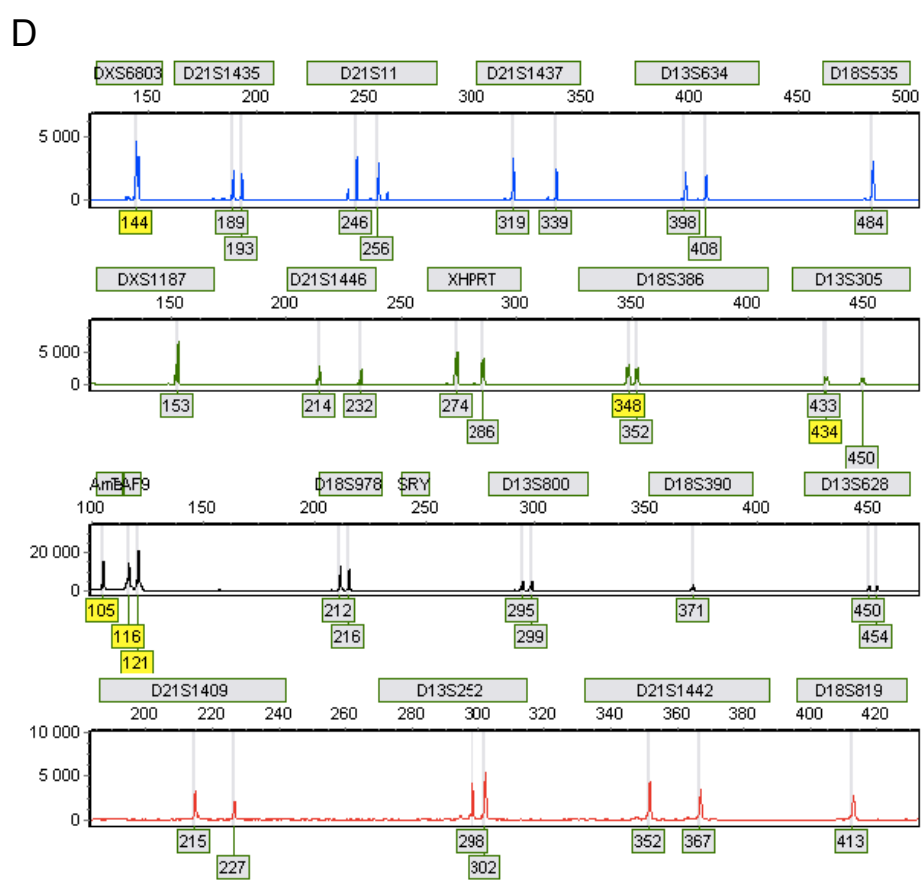

**Supplemental Figure S4**

Supplement: cei12421-sup-0004-fs4.pdf [file cei12421-sup-0004-fs4.pdf]
